# Supplementary material for: Asymmetric hybrid capacitors based on novel bearded carbon fiber cloth–pinhole polyaniline electrodes with excellent energy density
Source: Royal Society of Chemistry journal article supplement (doi:10.1039/c6ra16291f), 2016-01-01

**Fig.S1.** (a) A digital photograph showing the flexibility of the device. (b) The capacitor bended with angles from  $0^\circ$  to  $180^\circ$  at a scan rate of 20 mV/s.

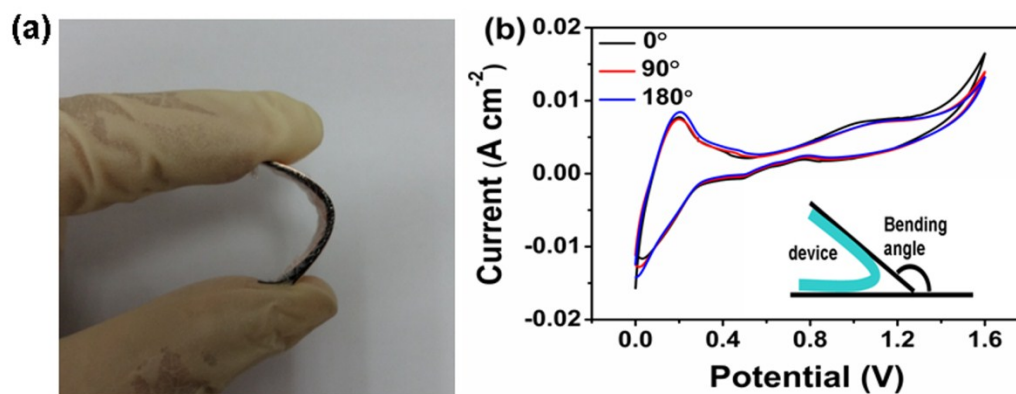

**Fig.S2.** Cycling stability of the flexible capacitor. Charge-discharge curves of the final five cycles are presented as the inset.

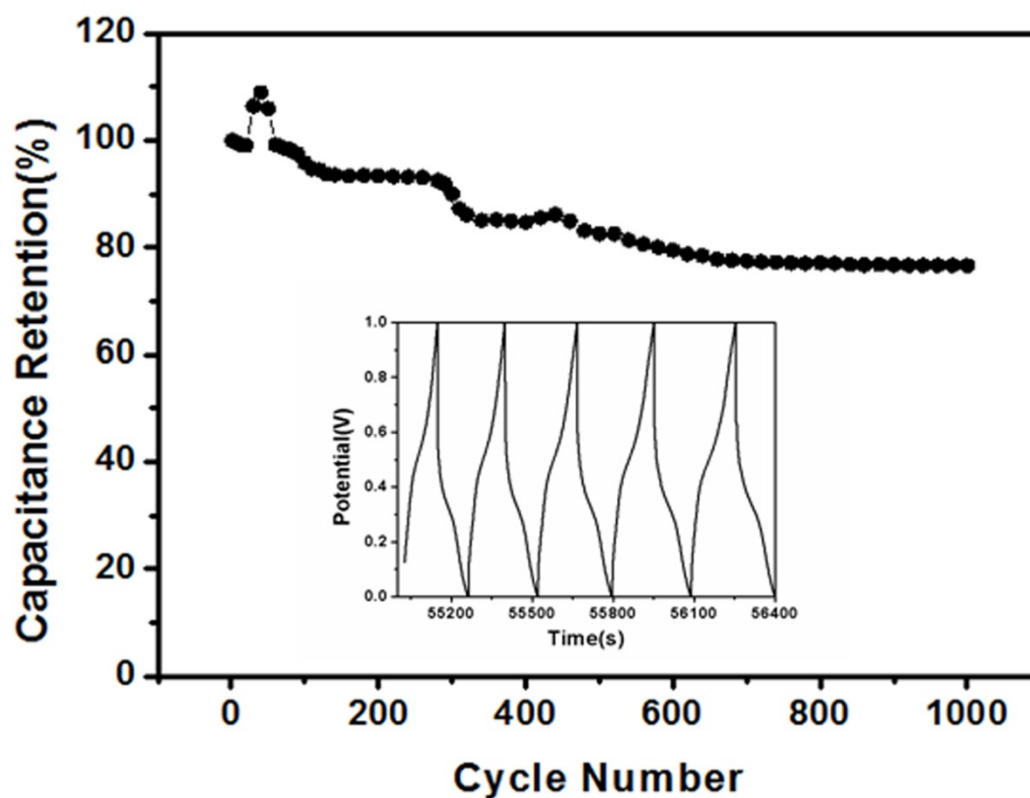

Supplement: c6ra16291f1.pdf [file c6ra16291f1.pdf]
